# Supplementary material
Source: publisher figshare collection journal article supplement (https://acs.figshare.com/ndownloader/files/11916518)
Supplement: Supplementary file 1 [file 11916518]

# Effects of piecewise electric field operation on sludge dewatering: phenomena and mathematical model

Hang Lv<sup>1#</sup>, Fang Wang<sup>1#</sup>, Daoguang Liu<sup>2</sup>, Yanlin Zhang<sup>1</sup>, Yueyuan Gu<sup>1</sup>, Du Yuan<sup>1</sup>, Siqi Xing<sup>1</sup>, Xu Wu<sup>1,\*</sup>, Jiakuan Yang<sup>1</sup>, Wenbiao Zhang<sup>2</sup>, Keith Scott<sup>3</sup>

1, School of Environmental Science and Engineering, Huazhong University of Science and Technology, 1037 Luoyu Road, Wuhan, 430074, China

2, Shanghai Techase Environment Protection Co., Ltd. 1121 North Zhongshan No. 2 Road, Shanghai, 200092, China

3, School of Chemical Engineering and Advanced Materials, Newcastle University, Newcastle upon Tyne, NE1 7RU, United Kingdom

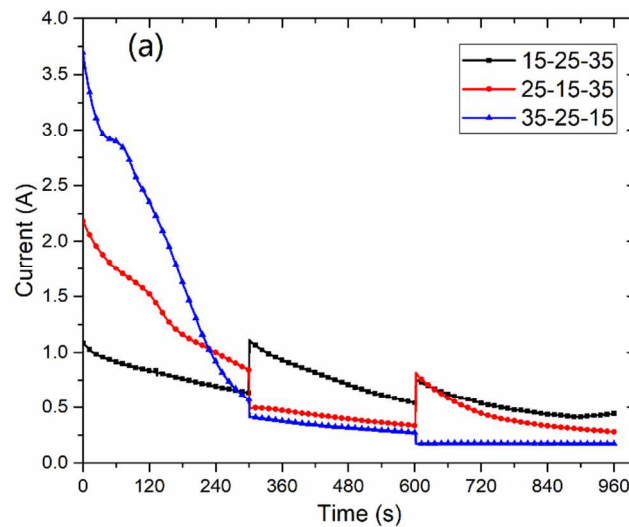

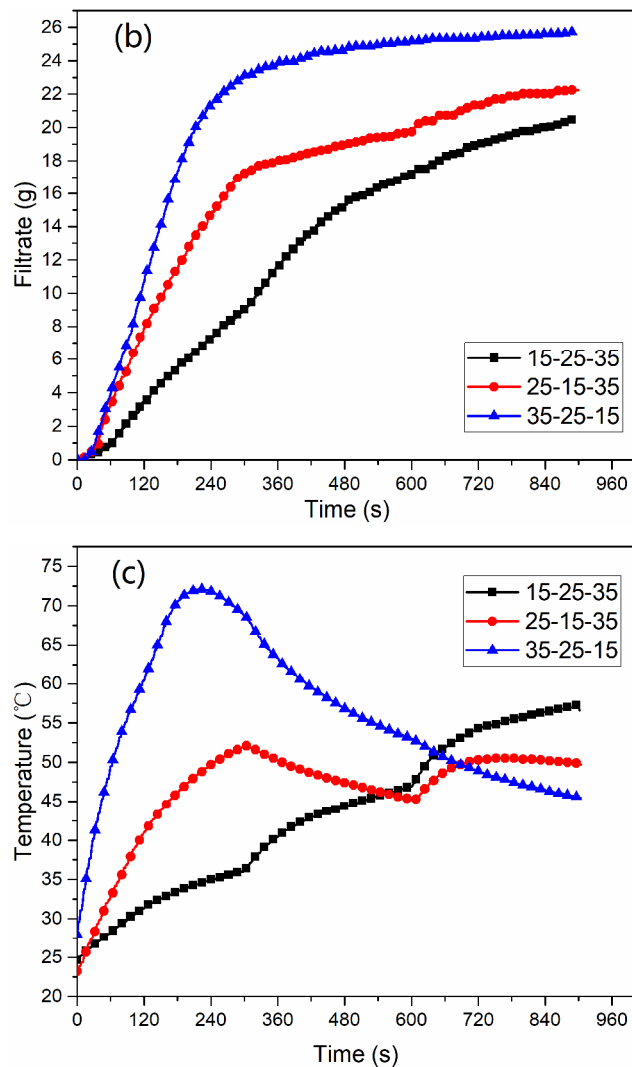

**Figure S1** Effect of piecewise voltage dewatering for three combinations (15-25-35, 25-15-35, 35-25-15). (a) Current, (b) mass of filtrate, and (c) sludge temperature at applied voltages in piecewise voltage EDW mode

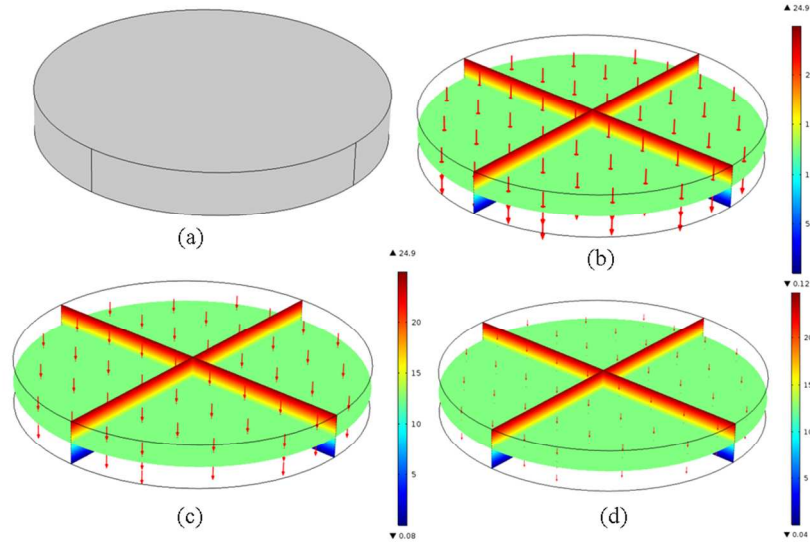

**Figure S2.** (a) Sludge cake 3D geometry, (b)  $t=0$  s, (c)  $t=80$  s, and (d)  $t=500$  s potential distribution and the flow velocity vector of electro-osmotic under 25V. The arrow represents water flow velocity  $u_0$ . The length of arrow represents the magnitude of the velocity.
